# Supplementary material
Source: publisher figshare collection journal article supplement (https://acs.figshare.com/ndownloader/files/4197868)
Supplement: Supplementary file 1 [file 4197868]

data_compound6
 
_audit_creation_method            SHELXL-97
_publ_contact_author_name  'Professor Catalina Ruiz-P\'erez'
_publ_contact_author_address
;
 Laboratorio de Rayos X y Materiales Moleculares
 Dpto. F\'isica Fundamental II. Facultad de F\'isica
 Universidad de La Laguna
 E-38204. La Laguna. Tenerife
 Spain
;
_publ_contact_author_email   caruiz@ull.es
 _chemical_name_systematic
;
 ?
;
_chemical_name_common             ?
_chemical_melting_point           ?
_chemical_formula_moiety          ?
_chemical_formula_sum
 'C15 H16 Co N2 O7'
_chemical_formula_weight          395.23
 
loop_
 _atom_type_symbol
 _atom_type_description
 _atom_type_scat_dispersion_real
 _atom_type_scat_dispersion_imag
 _atom_type_scat_source
 'C'  'C'   0.0033   0.0016
 'International Tables Vol C Tables 4.2.6.8 and 6.1.1.4'
 'H'  'H'   0.0000   0.0000
 'International Tables Vol C Tables 4.2.6.8 and 6.1.1.4'
 'N'  'N'   0.0061   0.0033
 'International Tables Vol C Tables 4.2.6.8 and 6.1.1.4'
 'O'  'O'   0.0106   0.0060
 'International Tables Vol C Tables 4.2.6.8 and 6.1.1.4'
 'Co'  'Co'   0.3494   0.9721
 'International Tables Vol C Tables 4.2.6.8 and 6.1.1.4'
 
_symmetry_cell_setting                  monoclinic
_symmetry_space_group_name_H-M          'P 21/n'
_symmetry_space_group_name_Hall         '-P 2yn'
_symmetry_Int_Tables_number             14
 
loop_
 _symmetry_equiv_pos_as_xyz
 'x, y, z'
 '-x+1/2, y+1/2, -z+1/2'
 '-x, -y, -z'
 'x-1/2, -y-1/2, z-1/2'
 
_cell_length_a                    15.149(3)
_cell_length_b                    6.6200(10)
_cell_length_c                    15.936(3)
_cell_angle_alpha                 90.00
_cell_angle_beta                  90.62(3)
_cell_angle_gamma                 90.00
_cell_volume                      1598.1(5)
_cell_formula_units_Z             4
_cell_measurement_temperature     293(2)
_cell_measurement_reflns_used     ?
_cell_measurement_theta_min       ?
_cell_measurement_theta_max       ?
 
_exptl_crystal_description        needle
_exptl_crystal_colour             red
_exptl_crystal_size_max           0.28
_exptl_crystal_size_mid           0.21
_exptl_crystal_size_min           0.10
_exptl_crystal_density_meas       ?
_exptl_crystal_density_diffrn     1.643
_exptl_crystal_density_method     'not measured'
_exptl_crystal_F_000              812
_exptl_absorpt_coefficient_mu     1.116
_exptl_absorpt_correction_type    sphere
_exptl_absorpt_correction_T_min   0.755
_exptl_absorpt_correction_T_max   0.894
_exptl_absorpt_process_details    ?
 
_exptl_special_details
;
 ?
;
 
_diffrn_ambient_temperature        293(2)
_diffrn_radiation_wavelength       0.71073
_diffrn_radiation_type             Mok\a
_diffrn_radiation_source          'fine-focus sealed tube'
_diffrn_radiation_monochromator   'horizonally mounted graphite crystal'
_diffrn_radiation_probe            x-ray
_diffrn_source                    'Enraf Nonius FR590'
_diffrn_detector                  'CCD plate'
_diffrn_detector_area_resol_mean   9
_diffrn_measurement_device        '95mm CCD camera on \k-goniostat'
_diffrn_measurement_device_type    KappaCCD
_diffrn_measurement_method        'CCD rotation images, thick slices'
_diffrn_standards_number          ?
_diffrn_standards_interval_count  ?
_diffrn_standards_interval_time   ?
_diffrn_standards_decay_%         ?
_diffrn_reflns_number             12757
_diffrn_reflns_av_R_equivalents   0.0861
_diffrn_reflns_av_sigmaI/netI     0.0892
_diffrn_reflns_limit_h_min        -18
_diffrn_reflns_limit_h_max        17
_diffrn_reflns_limit_k_min        -7
_diffrn_reflns_limit_k_max        7
_diffrn_reflns_limit_l_min        -18
_diffrn_reflns_limit_l_max        18
_diffrn_reflns_theta_min          6.40
_diffrn_reflns_theta_max          25.02
_reflns_number_total              2759
_reflns_number_gt                 1820
_reflns_threshold_expression      >2sigma(I)
 
_computing_data_collection        'Collect (Nonius BV, 1997-2000)'
_computing_cell_refinement        'Dirax/lsq (Duisenberg & Schreurs, 1989-2000)'
_computing_data_reduction         'EvalCCD (Duisenberg & Schreurs 1990-2000)'
_computing_structure_solution     'SHELXS-97 (Sheldrick, 1997)'
_computing_structure_refinement   'SHELXL-97 (Sheldrick, 1997)'
_computing_molecular_graphics     'Ortep-3 for Windows (Farrugia, 1997)'
_computing_publication_material   'WinGX publication routines (Farrugia, 1999)'
 
_refine_special_details
;
 Refinement of F^2^ against ALL reflections.  The weighted R-factor wR and
 goodness of fit S are based on F^2^, conventional R-factors R are based
 on F, with F set to zero for negative F^2^. The threshold expression of
 F^2^ > 2sigma(F^2^) is used only for calculating R-factors(gt) etc. and is
 not relevant to the choice of reflections for refinement.  R-factors based
 on F^2^ are statistically about twice as large as those based on F, and R-
 factors based on ALL data will be even larger.
;
 
_refine_ls_structure_factor_coef  Fsqd
_refine_ls_matrix_type            full
_refine_ls_weighting_scheme       calc
_refine_ls_weighting_details
 'calc w=1/[\s^2^(Fo^2^)+(0.0319P)^2^+0.0000P] where P=(Fo^2^+2Fc^2^)/3'
_atom_sites_solution_primary      direct
_atom_sites_solution_secondary    difmap
_atom_sites_solution_hydrogens    difmap
_refine_ls_hydrogen_treatment     refall
_refine_ls_extinction_method      none
_refine_ls_extinction_coef        ?
_refine_ls_number_reflns          2759
_refine_ls_number_parameters      290
_refine_ls_number_restraints      0
_refine_ls_R_factor_all           0.0942
_refine_ls_R_factor_gt            0.0448
_refine_ls_wR_factor_ref          0.0753
_refine_ls_wR_factor_gt           0.0659
_refine_ls_goodness_of_fit_ref    1.015
_refine_ls_restrained_S_all       1.015
_refine_ls_shift/su_max           0.000
_refine_ls_shift/su_mean          0.000
 
loop_
 _atom_site_label
 _atom_site_type_symbol
 _atom_site_fract_x
 _atom_site_fract_y
 _atom_site_fract_z
 _atom_site_U_iso_or_equiv
 _atom_site_adp_type
 _atom_site_occupancy
 _atom_site_symmetry_multiplicity
 _atom_site_calc_flag
 _atom_site_refinement_flags
 _atom_site_disorder_assembly
 _atom_site_disorder_group
Co1 Co 0.61167(3) 0.16211(6) 0.25765(3) 0.02476(16) Uani 1 1 d . . .
O1 O 0.71888(14) -0.0286(4) 0.27095(14) 0.0382(6) Uani 1 1 d . . .
O2 O 0.55477(13) -0.0096(3) 0.35119(14) 0.0341(6) Uani 1 1 d . . .
O3 O 0.81741(14) -0.2088(3) 0.34275(13) 0.0334(6) Uani 1 1 d . . .
O4 O 0.55531(15) -0.2205(3) 0.45907(15) 0.0443(7) Uani 1 1 d . . .
C1 C 0.7464(2) -0.1107(5) 0.3373(2) 0.0270(8) Uani 1 1 d . . .
C2 C 0.6936(2) -0.0902(7) 0.4168(2) 0.0318(9) Uani 1 1 d . . .
C3 C 0.5939(2) -0.1091(5) 0.4080(2) 0.0296(8) Uani 1 1 d . . .
N11 N 0.54448(16) -0.0158(4) 0.16654(16) 0.0260(6) Uani 1 1 d . . .
N12 N 0.49350(15) 0.3294(4) 0.23866(15) 0.0254(6) Uani 1 1 d . . .
C10 C 0.5701(3) -0.1868(6) 0.1320(2) 0.0378(9) Uani 1 1 d . . .
C11 C 0.5196(3) -0.2890(6) 0.0732(3) 0.0514(12) Uani 1 1 d . . .
C12 C 0.4391(3) -0.2144(6) 0.0492(3) 0.0496(12) Uani 1 1 d . . .
C13 C 0.4085(2) -0.0359(5) 0.0850(2) 0.0336(9) Uani 1 1 d . . .
C14 C 0.3249(2) 0.0541(7) 0.0660(3) 0.0432(10) Uani 1 1 d . . .
C15 C 0.2991(3) 0.2236(6) 0.1033(3) 0.0418(11) Uani 1 1 d . . .
C16 C 0.3537(2) 0.3246(5) 0.1637(2) 0.0309(8) Uani 1 1 d . . .
C17 C 0.3293(3) 0.5017(6) 0.2054(3) 0.0435(11) Uani 1 1 d . . .
C18 C 0.3861(3) 0.5866(6) 0.2613(3) 0.0468(11) Uani 1 1 d . . .
C19 C 0.4679(3) 0.4980(6) 0.2760(2) 0.0362(9) Uani 1 1 d . . .
C20 C 0.4641(2) 0.0584(5) 0.14367(19) 0.0244(8) Uani 1 1 d . . .
C21 C 0.4366(2) 0.2432(4) 0.1827(2) 0.0227(7) Uani 1 1 d . . .
O1W O 0.6614(2) 0.3738(5) 0.3419(2) 0.0543(9) Uani 1 1 d . . .
O2W O 0.61249(19) -0.6051(6) 0.50374(18) 0.0448(7) Uani 1 1 d . . .
O3W O 0.3740(2) 0.0668(7) 0.3748(2) 0.0622(10) Uani 1 1 d . . .
H1 H 0.7034(19) 0.031(5) 0.4364(19) 0.026(10) Uiso 1 1 d . . .
H2 H 0.715(2) -0.177(5) 0.457(2) 0.028(9) Uiso 1 1 d . . .
H10 H 0.625(2) -0.228(4) 0.1491(18) 0.026(9) Uiso 1 1 d . . .
H11 H 0.547(2) -0.401(5) 0.050(2) 0.056(12) Uiso 1 1 d . . .
H12 H 0.408(2) -0.278(5) 0.011(2) 0.035(10) Uiso 1 1 d . . .
H14 H 0.290(3) -0.010(6) 0.027(2) 0.059(12) Uiso 1 1 d . . .
H15 H 0.249(2) 0.273(4) 0.0938(19) 0.023(9) Uiso 1 1 d . . .
H17 H 0.279(2) 0.560(5) 0.191(2) 0.043(11) Uiso 1 1 d . . .
H18 H 0.377(2) 0.702(6) 0.288(2) 0.050(12) Uiso 1 1 d . . .
H19 H 0.505(2) 0.551(5) 0.316(2) 0.041(11) Uiso 1 1 d . . .
H1W1 H 0.654(2) 0.382(5) 0.391(3) 0.044(13) Uiso 1 1 d . . .
H2W1 H 0.699(3) 0.428(6) 0.323(3) 0.051(15) Uiso 1 1 d . . .
H1W2 H 0.573(3) -0.683(7) 0.513(3) 0.079(19) Uiso 1 1 d . . .
H2W2 H 0.591(3) -0.494(7) 0.500(3) 0.068(18) Uiso 1 1 d . . .
H1W3 H 0.378(3) 0.158(8) 0.411(4) 0.10(2) Uiso 1 1 d . . .
H2W3 H 0.423(4) 0.038(7) 0.363(3) 0.09(2) Uiso 1 1 d . . .
 
loop_
 _atom_site_aniso_label
 _atom_site_aniso_U_11
 _atom_site_aniso_U_22
 _atom_site_aniso_U_33
 _atom_site_aniso_U_23
 _atom_site_aniso_U_13
 _atom_site_aniso_U_12
Co1 0.0169(2) 0.0332(3) 0.0242(3) -0.0039(2) -0.00090(17) -0.0007(2)
O1 0.0292(13) 0.0607(16) 0.0247(13) 0.0068(13) 0.0028(11) 0.0179(12)
O2 0.0216(13) 0.0456(14) 0.0351(14) 0.0077(12) -0.0018(11) -0.0005(11)
O3 0.0217(13) 0.0465(15) 0.0318(14) 0.0011(11) -0.0028(10) 0.0120(11)
O4 0.0441(16) 0.0418(15) 0.0473(16) 0.0099(13) 0.0151(13) -0.0021(12)
C1 0.024(2) 0.032(2) 0.025(2) -0.0035(16) -0.0023(16) -0.0016(15)
C2 0.032(2) 0.040(3) 0.022(2) 0.002(2) -0.0006(17) 0.0088(19)
C3 0.029(2) 0.030(2) 0.030(2) -0.0069(17) 0.0078(18) 0.0011(16)
N11 0.0222(15) 0.0264(15) 0.0296(16) -0.0037(14) -0.0011(13) 0.0013(12)
N12 0.0230(14) 0.0255(15) 0.0276(15) -0.0048(14) -0.0005(12) -0.0021(13)
C10 0.031(2) 0.038(2) 0.044(2) -0.013(2) -0.0076(19) 0.001(2)
C11 0.045(3) 0.045(3) 0.064(3) -0.029(2) -0.002(2) 0.007(2)
C12 0.045(3) 0.049(3) 0.055(3) -0.027(2) -0.016(2) -0.003(2)
C13 0.033(2) 0.034(2) 0.033(2) -0.0077(18) -0.0047(18) -0.0064(17)
C14 0.029(2) 0.054(3) 0.046(3) -0.010(2) -0.020(2) -0.003(2)
C15 0.020(2) 0.058(3) 0.047(3) 0.007(2) -0.008(2) 0.005(2)
C16 0.0238(19) 0.036(2) 0.033(2) 0.0000(19) 0.0024(16) 0.0009(18)
C17 0.029(2) 0.053(3) 0.049(3) 0.004(2) -0.001(2) 0.014(2)
C18 0.046(3) 0.039(2) 0.055(3) -0.017(2) 0.004(2) 0.016(2)
C19 0.033(2) 0.038(2) 0.038(2) -0.012(2) -0.0038(19) 0.0023(19)
C20 0.0205(19) 0.0277(18) 0.0251(19) 0.0024(16) 0.0003(15) -0.0046(15)
C21 0.0189(19) 0.0259(17) 0.0234(18) 0.0004(16) 0.0000(15) -0.0022(14)
O1W 0.0489(19) 0.079(2) 0.0353(19) -0.0218(17) 0.0173(15) -0.0376(17)
O2W 0.0336(18) 0.057(2) 0.0442(18) 0.0038(15) 0.0031(13) -0.0002(17)
O3W 0.0303(19) 0.095(3) 0.062(2) -0.012(2) 0.0041(17) -0.0133(18)
 
_geom_special_details
;
 All esds (except the esd in the dihedral angle between two l.s. planes)
 are estimated using the full covariance matrix.  The cell esds are taken
 into account individually in the estimation of esds in distances, angles
 and torsion angles; correlations between esds in cell parameters are only
 used when they are defined by crystal symmetry.  An approximate (isotropic)
 treatment of cell esds is used for estimating esds involving l.s. planes.
;
 
loop_
 _geom_bond_atom_site_label_1
 _geom_bond_atom_site_label_2
 _geom_bond_distance
 _geom_bond_site_symmetry_2
 _geom_bond_publ_flag
Co1 O1 2.066(2) . ?
Co1 O2 2.070(2) . ?
Co1 O1W 2.077(3) . ?
Co1 O3 2.117(2) 2_655 ?
Co1 N11 2.121(3) . ?
Co1 N12 2.124(2) . ?
O1 C1 1.256(4) . ?
O2 C3 1.262(4) . ?
O3 C1 1.259(4) . ?
O3 Co1 2.117(2) 2_645 ?
O4 C3 1.249(4) . ?
C1 C2 1.510(5) . ?
C2 C3 1.520(5) . ?
N11 C10 1.319(4) . ?
N11 C20 1.359(4) . ?
N12 C19 1.325(4) . ?
N12 C21 1.359(4) . ?
C10 C11 1.381(5) . ?
C11 C12 1.366(5) . ?
C12 C13 1.394(5) . ?
C13 C20 1.398(4) . ?
C13 C14 1.429(5) . ?
C14 C15 1.330(5) . ?
C15 C16 1.428(5) . ?
C16 C21 1.397(4) . ?
C16 C17 1.400(5) . ?
C17 C18 1.353(5) . ?
C18 C19 1.388(5) . ?
C20 C21 1.436(4) . ?
 
loop_
 _geom_angle_atom_site_label_1
 _geom_angle_atom_site_label_2
 _geom_angle_atom_site_label_3
 _geom_angle
 _geom_angle_site_symmetry_1
 _geom_angle_site_symmetry_3
 _geom_angle_publ_flag
O1 Co1 O2 85.61(9) . . ?
O1 Co1 O1W 93.85(11) . . ?
O2 Co1 O1W 93.20(12) . . ?
O1 Co1 O3 85.38(9) . 2_655 ?
O2 Co1 O3 169.94(9) . 2_655 ?
O1W Co1 O3 91.88(12) . 2_655 ?
O1 Co1 N11 95.84(10) . . ?
O2 Co1 N11 89.29(9) . . ?
O1W Co1 N11 170.15(11) . . ?
O3 Co1 N11 87.16(9) 2_655 . ?
O1 Co1 N12 173.50(10) . . ?
O2 Co1 N12 91.83(9) . . ?
O1W Co1 N12 92.26(11) . . ?
O3 Co1 N12 96.64(9) 2_655 . ?
N11 Co1 N12 78.13(10) . . ?
C1 O1 Co1 127.1(2) . . ?
C3 O2 Co1 127.3(2) . . ?
C1 O3 Co1 126.6(2) . 2_645 ?
O1 C1 O3 123.8(3) . . ?
O1 C1 C2 119.6(3) . . ?
O3 C1 C2 116.6(3) . . ?
C1 C2 C3 116.7(3) . . ?
O4 C3 O2 123.8(3) . . ?
O4 C3 C2 117.4(3) . . ?
O2 C3 C2 118.8(3) . . ?
C10 N11 C20 117.7(3) . . ?
C10 N11 Co1 128.3(2) . . ?
C20 N11 Co1 113.9(2) . . ?
C19 N12 C21 117.5(3) . . ?
C19 N12 Co1 128.7(2) . . ?
C21 N12 Co1 113.7(2) . . ?
N11 C10 C11 122.7(4) . . ?
C12 C11 C10 120.0(4) . . ?
C11 C12 C13 119.4(4) . . ?
C12 C13 C20 116.9(3) . . ?
C12 C13 C14 124.3(4) . . ?
C20 C13 C14 118.8(3) . . ?
C15 C14 C13 121.4(4) . . ?
C14 C15 C16 121.7(4) . . ?
C21 C16 C17 117.5(3) . . ?
C21 C16 C15 118.5(3) . . ?
C17 C16 C15 124.0(4) . . ?
C18 C17 C16 119.4(4) . . ?
C17 C18 C19 119.7(4) . . ?
N12 C19 C18 123.0(4) . . ?
N11 C20 C13 123.3(3) . . ?
N11 C20 C21 117.1(3) . . ?
C13 C20 C21 119.6(3) . . ?
N12 C21 C16 122.9(3) . . ?
N12 C21 C20 117.2(3) . . ?
C16 C21 C20 120.0(3) . . ?
 
_diffrn_measured_fraction_theta_max    0.979
_diffrn_reflns_theta_full              25.02
_diffrn_measured_fraction_theta_full   0.979
_refine_diff_density_max    0.331
_refine_diff_density_min   -0.339
_refine_diff_density_rms    0.070
